# Supplementary material for: Pluripotent Stem Cell-Derived Mesenchymal Stem Cells Show Comparable Functionality to Their Autologous Origin
Source: PubMed Central journal article supplement (PMC7823915; doi:10.3390/cells10010033), 2020-12-28

**Supplemental Table S1: Antibodies used in Fluorescence activated cell sorting**

| <b>Antibody</b>                        | <b>Clone</b> | <b>Dilution</b> | <b>Supplier</b>           |
|----------------------------------------|--------------|-----------------|---------------------------|
| Pacific Blue anti-human CD11b          | ICRF44       | 0.2 mg/ml       | BioLegend, San Diego, USA |
| PE anti-human CD34                     | 561          | 25 µg/ml        | BioLegend, San Diego, USA |
| FITC anti-human CD44                   | BJ18         | 200 µg/ml       | BioLegend, San Diego, USA |
| Pacific Blue anti-human CD45           | H130         | 0.5 mg/ml       | BioLegend, San Diego, USA |
| APC anti-human CD73                    | AD2          | 100 µg/ml       | BioLegend, San Diego, USA |
| FITC anti-human CD90 (Thy1)            | 5E10         | 200 µg/ml       | BioLegend, San Diego, USA |
| APC anti-human CD105                   | 43A3         | 100 µg/ml       | BioLegend, San Diego, USA |
| <b>Secondary antibody</b>              | <b>Type</b>  | <b>Dilution</b> | <b>Supplier</b>           |
| APC Mouse IgG1, k isotype Ctrl (FC)    | MOPC-21      | 200 µg/ml       | BioLegend, San Diego, USA |
| Pacific Blue Mouse IgG1 k isotype Ctrl | MOPC-21      | 0.5 mg/ml       | BioLegend, San Diego, USA |
| PE Mouse IgG2a, k isotype Ctrl         | MOPC-173     | 0.2 mg/ml       | BioLegend, San Diego, USA |
| FITC Mouse IgG1, k isotype Ctrl        | MOPC-21      | 2,5 mg/µl       | BioLegend, San Diego, USA |

**Supplemental Table S2: Antibodies used in Immunocytochemistry**

| <b>Primary antibody</b>   | <b>Type</b>            | <b>Dilution in 1% BSA</b> | <b>Supplier</b>                          |
|---------------------------|------------------------|---------------------------|------------------------------------------|
| NANOG                     | Polyclonal goat IgG    | 1:200 (+0.1% Triton-X)    | R&D Systems, Minneapolis, USA            |
| OCT4                      | Polyclonal goat IgG    | 1:40 (+0.1% Triton-X)     | R&D Systems, Minneapolis, USA            |
| SOX2                      | monoclonal mouse IgG2A | 1:50 (+0.1% Triton-X)     | R&D Systems, Minneapolis, USA            |
| LIN28                     | Polyclonal goat IgG    | 1:300 (+0.1% Triton-X)    | R&D Systems, Minneapolis, USA            |
| TRA1-60                   | Monoclonal mouse IgM   | 1:200                     | Abcam, Cambridge, UK                     |
| SSEA4                     | monoclonal mouse IgG2A | 1:200                     | Abcam, Cambridge, UK                     |
| AFP                       | Polyclonal rabbit IgG  | 1:100 (+0.1% Triton-X)    | Dako, Hamburg, Germany                   |
| α-SMA                     | Monoclonal mouse IgG2A | 1:3000 (+0.1% Triton-X)   | Sigma Aldrich, St. Louis, USA            |
| βIII-tubulin              | mouse IgG2A            | 1:1000 (+0.1% Triton-X)   | BioLegend, San Diego, USA                |
| <b>Secondary antibody</b> | <b>Type</b>            | <b>Dilution</b>           | <b>Supplier</b>                          |
| Alexa Fluor 555 α-goat    | Donkey-α-goat IgG      | 1:1000                    | Thermo Fischer Scientific, Waltham USA   |
| Alexa Fluor 488 α-mouse   | Donkey-α-mouse IgG     | 1:1000                    | Thermo Fischer Scientific, Waltham USA   |
| Alexa Fluor 555 α-rabbit  | Donkey-α-goat IgG      | 1:1000                    | Thermo Fischer Scientific, Waltham USA   |
| Cyanine Cy3 α-mouse       | Goat-α-mouse IgG+IgM   | 1:300                     | Jackson Immuno Research, West Grove, USA |

**Supplemental Table S3:** Primers used in RT-PCR

| Primer       | Forward primer sequence        | Reverse primer sequence            | Product size (bp) | Annealing temperature | Cycle |
|--------------|--------------------------------|------------------------------------|-------------------|-----------------------|-------|
| <i>GAPDH</i> | AGAGGCAGGGATGATGTTCT           | TCTGCTGATGCCCCATGTT                | 258               | 58°                   | 30    |
| <i>SOX2</i>  | ATGCACCGCTACGACGTGA            | CTTTTGACCCCTCCCATTT                | 437               | 58°                   | 30    |
| <i>GDF3</i>  | TTCGCTTTCTCCAGACCAAGGT<br>TTC  | TACATCCAGCAGGTTGAAGTGAACAGCAC<br>C | 311               | 58°                   | 34    |
| <i>OCT4</i>  | GACAACAATGAAAATCTTCAGG<br>AGA  | TTCTGGCGCCGGTTACAGAACCA            | 218               | 58°                   | 32    |
| <i>FOXD3</i> | GTGAAGCCGCCTTACTCGTAC          | CCGAAGCTCTGCATCATGAG               | 353               | 58°                   | 38    |
| <i>LIN28</i> | AGTAAGCTGCACATGGAAGG           | ATTGTGGCTCAATTCTGTGC               | 410               | 58°                   | 36    |
| <i>NANOG</i> | AGTCCCAAAGGCAAACAACCCA<br>CTTC | ATCTGCTGGAGGCTGAGGTATTTCTGTCTC     | 164               | 64°                   | 30    |
| <i>AFP</i>   | ACTCCAGTAAACCCTGGTGTG          | GAAATCTGCAATGACAGCCTCA             | 255               | 58°                   | 30    |
| <i>CTNT</i>  | GACAGAGCGGAAAAGTGGGA           | TGAAGGAGGCCAGGCTCTAT               | 305               | 58°                   | 30    |
| <i>TH</i>    | GCGGTTTCATTGGGCGCAGG           | CAAACACCTTCACAGCTCG                | 215               | 60°                   | 38    |

**Supplemental Table S4:** Cell surface marker expression of nasal mucosa mesenchymal stem cells (mMSCs), induced pluripotent stem cells (iPSC) and induced pluripotent stem cell-derived mesenchymal stem cells (iP-MSCs) on a patient-specific level.

| cell line | CD11b | CD34  | CD44  | CD45  | CD73   | CD90  | CD105 |
|-----------|-------|-------|-------|-------|--------|-------|-------|
| mMSC2     | 70    | 0     | 20782 | 31    | 29149  | 24069 | 862   |
| iP-MSC2   | 630   | 0     | 87803 | 85    | 115375 | 18151 | 3106  |
| mMSC3     | 20    | 0     | 20615 | 86    | 23350  | 7362  | 271   |
| iP-MSC3   | 0     | 0     | 44054 | 0     | 58954  | 24548 | 3971  |
| mMSC5     | 21    | 22    | 15743 | 27    | 26568  | 23388 | 685   |
| iP-MSC5   | n. a. | n. a. | n. a. | n. a. | n. a.  | n. a. | n. a. |
| mMSC7     | 15    | 22    | 18377 | 33    | 28433  | 28265 | 605   |
| iP-MSC7   | 89    | 0     | 9758  | 45    | 8855   | 4182  | 350   |

**Supplemental Figure S1: Immunomodulatory potential of nasal mucosa mesenchymal stem cells (mMSCs), induced pluripotent stem cells (iPSC) and induced pluripotent stem cell-derived mesenchymal stem cells (iP-MSCs) on a patient-specific level. 1** Inhibition of CD4<sup>+</sup> T cell proliferation at different CD4<sup>+</sup>:MSC/iPSC ratios (0:1; 0.2:1, 1:1, and 2:1) and the presence of IL-6 and IL-8 in the supernatant of mMSC, iPSC, and iP-MSC after a culture of 24 hours measured by ELISA using cell lines of 4 different patients. **2** Individual inhibition of CD4<sup>+</sup> T cell proliferation of mMSC, iPSC, and iP-MSC from each patient.

1

| ratio<br>CD4:MSC/iPSC | 0:1                              | 0,5:1 | 1:1  | 2:1  | IL-6 [pg/ml]        | IL-8 [pg/ml]        |
|-----------------------|----------------------------------|-------|------|------|---------------------|---------------------|
| <b>cell line</b>      | <b>proliferating T cells [%]</b> |       |      |      | <b>average [SD]</b> | <b>average [SD]</b> |
| mMSC2                 | 65.4                             | 11.9  | 4.75 | 4.3  | 4817.3 [286.2]      | 274.5 [30.1]        |
| iPSC2                 | 64.7                             | 88.1  | 81.5 | 63.7 | 106.1 [183.8]       | 0                   |
| iP-MSC2               | 63.3                             | 56.2  | 37.3 | 22.9 | n.a.                | n.a.                |
| mMSC3                 | 57.4                             | 18.1  | 6.6  | 7.05 | 8991.3 [304.1]      | 866.4 [0]           |
| iPSC3                 | 62.8                             | 78.4  | 80.6 | 79.6 | 7.9 [13.8]          | 3.1 [5.4]           |
| iP-MSC3               | 63                               | 49.2  | 20.1 | 13.5 | 381.5 [9.2]         | 370.1 [15.3]        |
| mMSC5                 | 61.8                             | 19    | 14.7 | 2.45 | 5732.7 [602.2]      | 244.8 [17.3]        |
| iPSC5                 | 69.2                             | 81.4  | 78.2 | 78.8 | 16.7 [23.6]         | 0                   |
| iP-MSC5               | n.a.                             | n.a.  | n.a. | n.a. | n.a.                | n.a.                |
| mMSC7                 | 71.4                             | 12.4  | 2.43 | 1.97 | 6736.0 [1027.7]     | 316.7 [74.4]        |
| iPSC7                 | 70.1                             | 76.6  | 83   | 76.1 | 0                   | 0                   |
| iP-MSC7               | 75.2                             | 51.7  | 26.7 | 21.9 | 202.7 [65.9]        | 90.6 [2.5]          |

2

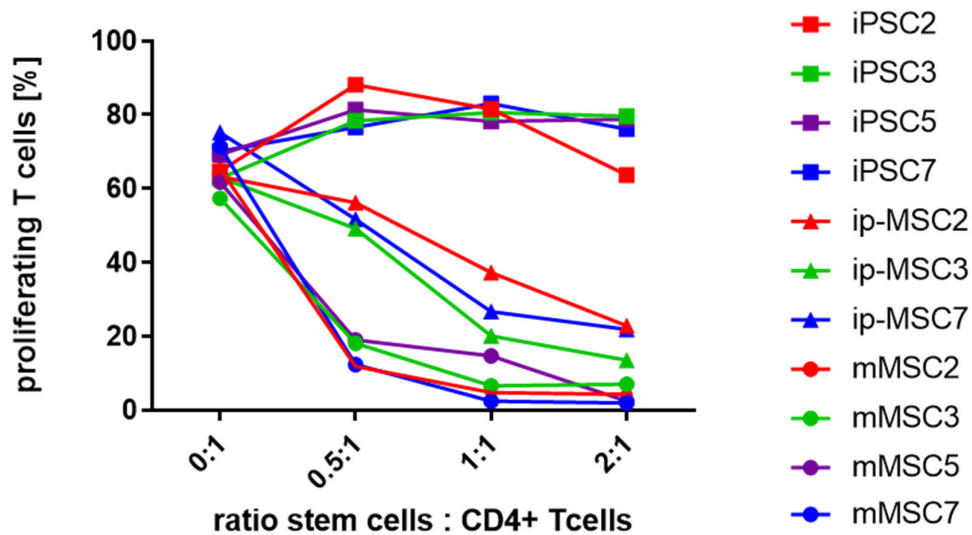

Supplement: cells-10-00033-s001.pdf [file cells-10-00033-s001.pdf]
